# Supplementary material for: From lab to fab: how must the polymer solar cell materials design change? – an industrial perspective
Source: Royal Society of Chemistry journal article supplement (doi:10.1039/c3ee43460e), 2013-12-10
Supplement: c3ee43460e.pdf [file c3ee43460e.pdf]

## ELECTRONIC SUPPORTING INFORMATION

### **From Lab to Fab: how must the polymer solar cells materials design change ? – An industrial perspective**

Riccardo Po,\* Andrea Bernardi, Anna Calabrese,  
Chiara Carbonera, Gianni Corso and Andrea Pellegrino

Research Center for non-Conventional Energies – Istituto eni Donegani,  
eni S.p.A., Via Fauser 4, 28100 Novara, Italy

#### 1. Active layer drying tests

The ITO-coated glass substrates were first cleaned with detergent, ultrasonicated in water, acetone and isopropyl alcohol, and dried in nitrogen flux. Four solutions containing a mixture of P3HT:PC60BM with a weight ratio of 1:0.8 in either chloroform, chlorobenzene, 1,2-dichlorobenzene or 1,2,4-trichlorobenzene respectively, with a total concentration of 18 mg/ml, were spin cast (300 rpm, 90 s) on top of ITO obtaining film thickness of approximately 200 nm and left to dry either at room temperature or at 90°C on a hot plate. Images and videos were acquired by an handheld digital microscope (Dino-lite Digital Microscope), with a rotatable polarizer that helps suppressing light reflections improving the visibility of important details.

#### 2. Fabrication and testing of inverted solar cells

Glass/ITO/ZnO/P3HT:PCBM/MoO<sub>3</sub>/Ag or glass/ITO/ZnO/P3HT:PCBM/PEDOT:PSS/Ag solar cells were fabricated in air by first spin-coating a 0.162 M [Zn<sup>++</sup>]:2-aminoethanol solution in buthanol on top of cleaned ITO-coated glass substrates (18 Ω/sq, Kintec Co., Hong Kong) at 600 rpm for 150 s. The layer (30 nm) was left to dry in air and then thermally treated for different times at different temperatures. A 18

mg/mL solution of P3HT:PCBM 1:0.8 (wt/wt) in chlorobenzene was then spin coated at 300 rpm for 90 s on top of ZnO. After that, either a layer of MoO<sub>3</sub> (10 nm) was thermally evaporated, or 150 nm of PEDOT:PSS (Clevios CPP 105 D, Heraeus GmbH) was spin coated on top of the active layer (180 nm). In the second case the anode buffer layer was annealed on a hot plate at 120°C for 10 min. The devices were completed by the deposition of silver anode (100 nm) in a thermal evaporator under a vacuum of  $2 \times 10^{-6}$  torr. Each substrate contained 3 cells, each one with a nominal active area of 26 mm<sup>2</sup>. The effective active area of each cell was measured by using an optical microscope. The film thicknesses were measured on a Veeco Dektat 150 profilometer. Current-voltage characteristics were measured by using a Keithley 2602A sourcemeter. The light intensity of 1.5 AM sunlight from an Abet 2000 solar simulator was calibrated by a KG-5 filtered Si photodiode (Rera Solutions). Solar cells were illuminated through a 4x4 mm shadow mask.
